# Supplementary material
Source: publisher site journal article supplement (https://www.spandidos-publications.com/3606/downloadSupplementary)

Figure S1. Flow chart of the methods used in the present study. NP, nucleus pulposus; LPS, lipopolysaccharide; miR, microRNA; TLR4, toll-like receptor 4; RT-qPCR, reverse transcription-quantitative PCR; WB, western blotting.

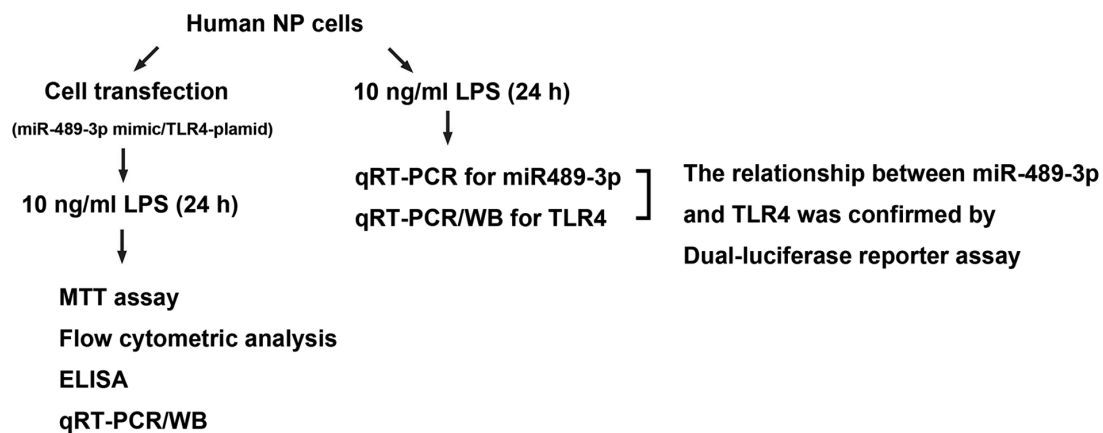

Supplement: Supplementary file 1 [file downloadSupplementary]
